# Supplementary material
Source: PubMed Central journal article supplement (PMC6348011)
Supplement: NIHMS1512170-supplement-1.pdf [file NIHMS1512170-supplement-1.pdf]

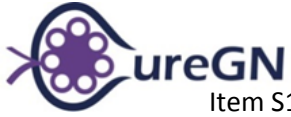

Item S1: CureGN Pediatric Quality of Life Questionnaire (8-17yrs)

Please indicate on the picture where you have had swelling in the past 7 days. Then, indicate how **bad** it was at each location **at its worst** in the **past 7 days**.

|                             | Absent <span style="float: right;">Worst Imaginable</span> |                               |                               |                               |                               |                               |
|-----------------------------|------------------------------------------------------------|-------------------------------|-------------------------------|-------------------------------|-------------------------------|-------------------------------|
| A. Swelling in your:        |                                                            |                               |                               |                               |                               |                               |
| 1. Whole body               | <input type="checkbox"/><br>0                              | <input type="checkbox"/><br>1 | <input type="checkbox"/><br>2 | <input type="checkbox"/><br>3 | <input type="checkbox"/><br>4 | <input type="checkbox"/><br>5 |
| 2. Face or around your eyes | <input type="checkbox"/><br>0                              | <input type="checkbox"/><br>1 | <input type="checkbox"/><br>2 | <input type="checkbox"/><br>3 | <input type="checkbox"/><br>4 | <input type="checkbox"/><br>5 |
| 3. Fingers or hands         | <input type="checkbox"/><br>0                              | <input type="checkbox"/><br>1 | <input type="checkbox"/><br>2 | <input type="checkbox"/><br>3 | <input type="checkbox"/><br>4 | <input type="checkbox"/><br>5 |
| 4. Arms                     | <input type="checkbox"/><br>0                              | <input type="checkbox"/><br>1 | <input type="checkbox"/><br>2 | <input type="checkbox"/><br>3 | <input type="checkbox"/><br>4 | <input type="checkbox"/><br>5 |
| 5. Stomach or abdomen       | <input type="checkbox"/><br>0                              | <input type="checkbox"/><br>1 | <input type="checkbox"/><br>2 | <input type="checkbox"/><br>3 | <input type="checkbox"/><br>4 | <input type="checkbox"/><br>5 |
| 6. Genitalia                | <input type="checkbox"/><br>0                              | <input type="checkbox"/><br>1 | <input type="checkbox"/><br>2 | <input type="checkbox"/><br>3 | <input type="checkbox"/><br>4 | <input type="checkbox"/><br>5 |
| 7. Legs                     | <input type="checkbox"/><br>0                              | <input type="checkbox"/><br>1 | <input type="checkbox"/><br>2 | <input type="checkbox"/><br>3 | <input type="checkbox"/><br>4 | <input type="checkbox"/><br>5 |
| 8. Feet                     | <input type="checkbox"/><br>0                              | <input type="checkbox"/><br>1 | <input type="checkbox"/><br>2 | <input type="checkbox"/><br>3 | <input type="checkbox"/><br>4 | <input type="checkbox"/><br>5 |

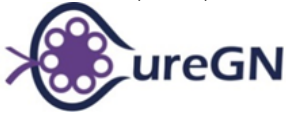

CureGN Pediatric Quality of Life Questionnaire (8-17yrs)

Think about how your kidney disease made you feel over the **past 7 days**. Circle the number showing how good or bad you felt about these kidney disease-related symptoms in the **past 7 days**. (Select **ONE** number for each item.)"

|                                  | Absent                        | Mild                          |                               |                               |                               | Worst Imaginable              |
|----------------------------------|-------------------------------|-------------------------------|-------------------------------|-------------------------------|-------------------------------|-------------------------------|
| B1. Pain where you have swelling | <input type="checkbox"/><br>0 | <input type="checkbox"/><br>1 | <input type="checkbox"/><br>2 | <input type="checkbox"/><br>3 | <input type="checkbox"/><br>4 | <input type="checkbox"/><br>5 |
| B2. Trouble breathing            | <input type="checkbox"/><br>0 | <input type="checkbox"/><br>1 | <input type="checkbox"/><br>2 | <input type="checkbox"/><br>3 | <input type="checkbox"/><br>4 | <input type="checkbox"/><br>5 |
| B3. Trouble falling asleep       | <input type="checkbox"/><br>0 | <input type="checkbox"/><br>1 | <input type="checkbox"/><br>2 | <input type="checkbox"/><br>3 | <input type="checkbox"/><br>4 | <input type="checkbox"/><br>5 |
| B4. Waking up at night           | <input type="checkbox"/><br>0 | <input type="checkbox"/><br>1 | <input type="checkbox"/><br>2 | <input type="checkbox"/><br>3 | <input type="checkbox"/><br>4 | <input type="checkbox"/><br>5 |

| Please respond to each item by marking ONE box per row.                                               | Excellent                     | Very Good                     | Good                          | Fair                          | Poor                          |
|-------------------------------------------------------------------------------------------------------|-------------------------------|-------------------------------|-------------------------------|-------------------------------|-------------------------------|
| C1. In general, would you say your health is:                                                         | <input type="checkbox"/><br>5 | <input type="checkbox"/><br>4 | <input type="checkbox"/><br>3 | <input type="checkbox"/><br>2 | <input type="checkbox"/><br>1 |
| C2. In general, would you say your quality of life is:                                                | <input type="checkbox"/><br>5 | <input type="checkbox"/><br>4 | <input type="checkbox"/><br>3 | <input type="checkbox"/><br>2 | <input type="checkbox"/><br>1 |
| C3. In general, how would you rate your physical health?                                              | <input type="checkbox"/><br>5 | <input type="checkbox"/><br>4 | <input type="checkbox"/><br>3 | <input type="checkbox"/><br>2 | <input type="checkbox"/><br>1 |
| C4. In general, how would you rate your mental health, including your mood and your ability to think? | <input type="checkbox"/><br>5 | <input type="checkbox"/><br>4 | <input type="checkbox"/><br>3 | <input type="checkbox"/><br>2 | <input type="checkbox"/><br>1 |
| In the past 7 days...                                                                                 | Always                        | Often                         | Sometimes                     | Rarely                        | Never                         |
| C5. How often do you feel really sad?                                                                 | <input type="checkbox"/><br>1 | <input type="checkbox"/><br>2 | <input type="checkbox"/><br>3 | <input type="checkbox"/><br>4 | <input type="checkbox"/><br>5 |
| C6. How often do you have fun with friends?                                                           | <input type="checkbox"/><br>5 | <input type="checkbox"/><br>4 | <input type="checkbox"/><br>3 | <input type="checkbox"/><br>2 | <input type="checkbox"/><br>1 |
| C7. How often do your parents listen to your ideas?                                                   | <input type="checkbox"/><br>5 | <input type="checkbox"/><br>4 | <input type="checkbox"/><br>3 | <input type="checkbox"/><br>2 | <input type="checkbox"/><br>1 |

**C8. Please mark the number that best shows how much pain you had in the past 7 days.**

Wong-Baker FACES Pain Rating Scale

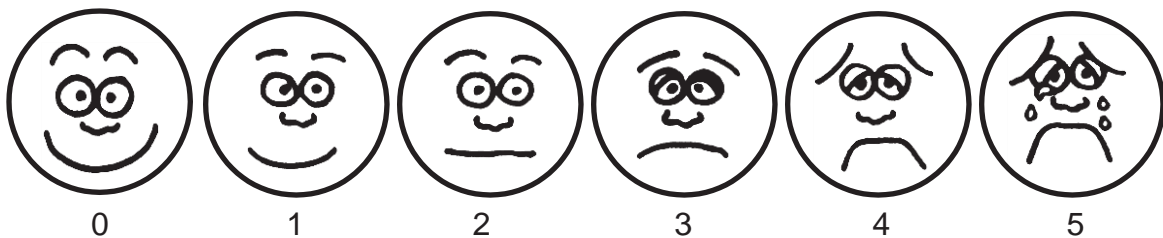

- 0= Very happy, no hurt.
- 1= Hurts just a little bit.
- 2= Hurts a little more.
- 3= Hurts even more.
- 4= Hurts a whole lot.
- 5= Hurts as much as you can imagine. (You don't have to be crying to feel this much pain.)



CureGN Pediatric Quality of Life Questionnaire (8-17yrs)

| In the past 7 days...                                                                      | Never                         | Almost Never                  | Sometimes                     | Often                         | Almost Always                 |
|--------------------------------------------------------------------------------------------|-------------------------------|-------------------------------|-------------------------------|-------------------------------|-------------------------------|
| D1. I felt worried.                                                                        | <input type="checkbox"/><br>0 | <input type="checkbox"/><br>1 | <input type="checkbox"/><br>2 | <input type="checkbox"/><br>3 | <input type="checkbox"/><br>4 |
| D2. I felt stressed.                                                                       | <input type="checkbox"/><br>0 | <input type="checkbox"/><br>1 | <input type="checkbox"/><br>2 | <input type="checkbox"/><br>3 | <input type="checkbox"/><br>4 |
| D3. Being tired made it hard for me to play or go out with my friends as much as I'd like. | <input type="checkbox"/><br>0 | <input type="checkbox"/><br>1 | <input type="checkbox"/><br>2 | <input type="checkbox"/><br>3 | <input type="checkbox"/><br>4 |
| D4. I felt weak.                                                                           | <input type="checkbox"/><br>0 | <input type="checkbox"/><br>1 | <input type="checkbox"/><br>2 | <input type="checkbox"/><br>3 | <input type="checkbox"/><br>4 |
| D5. I got tired easily.                                                                    | <input type="checkbox"/><br>0 | <input type="checkbox"/><br>1 | <input type="checkbox"/><br>2 | <input type="checkbox"/><br>3 | <input type="checkbox"/><br>4 |
| D6. Being tired made it hard for me to keep up with my schoolwork.                         | <input type="checkbox"/><br>0 | <input type="checkbox"/><br>1 | <input type="checkbox"/><br>2 | <input type="checkbox"/><br>3 | <input type="checkbox"/><br>4 |
| D7. I had trouble finishing things because I was too tired.                                | <input type="checkbox"/><br>0 | <input type="checkbox"/><br>1 | <input type="checkbox"/><br>2 | <input type="checkbox"/><br>3 | <input type="checkbox"/><br>4 |
| D8. I had trouble starting things because I was too tired.                                 | <input type="checkbox"/><br>0 | <input type="checkbox"/><br>1 | <input type="checkbox"/><br>2 | <input type="checkbox"/><br>3 | <input type="checkbox"/><br>4 |
| D9. I was so tired it was hard for me to pay attention.                                    | <input type="checkbox"/><br>0 | <input type="checkbox"/><br>1 | <input type="checkbox"/><br>2 | <input type="checkbox"/><br>3 | <input type="checkbox"/><br>4 |
| D10. I was too tired to do sports or exercise.                                             | <input type="checkbox"/><br>0 | <input type="checkbox"/><br>1 | <input type="checkbox"/><br>2 | <input type="checkbox"/><br>3 | <input type="checkbox"/><br>4 |
| D11. I was too tired to do things outside.                                                 | <input type="checkbox"/><br>0 | <input type="checkbox"/><br>1 | <input type="checkbox"/><br>2 | <input type="checkbox"/><br>3 | <input type="checkbox"/><br>4 |
| D12. I was too tired to enjoy the things I like to do.                                     | <input type="checkbox"/><br>0 | <input type="checkbox"/><br>1 | <input type="checkbox"/><br>2 | <input type="checkbox"/><br>3 | <input type="checkbox"/><br>4 |
| In the past 7 days.....                                                                    | With No Trouble               | With a Little Trouble         | With Some Trouble             | With a Lot of Trouble         | Not Able to Do                |
| D13. I could do sports and exercise that other kids my age could do.                       | <input type="checkbox"/><br>4 | <input type="checkbox"/><br>3 | <input type="checkbox"/><br>2 | <input type="checkbox"/><br>1 | <input type="checkbox"/><br>0 |
| D14. I could keep up when I played with other kids.                                        | <input type="checkbox"/><br>4 | <input type="checkbox"/><br>3 | <input type="checkbox"/><br>2 | <input type="checkbox"/><br>1 | <input type="checkbox"/><br>0 |
| D15. I could walk up stairs without holding on to anything.                                | <input type="checkbox"/><br>4 | <input type="checkbox"/><br>3 | <input type="checkbox"/><br>2 | <input type="checkbox"/><br>1 | <input type="checkbox"/><br>0 |
| D16. I have been physically able to do the activities I enjoy most.                        | <input type="checkbox"/><br>4 | <input type="checkbox"/><br>3 | <input type="checkbox"/><br>2 | <input type="checkbox"/><br>1 | <input type="checkbox"/><br>0 |

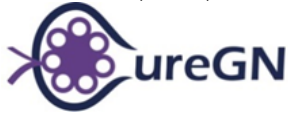

CureGN Pediatric Quality of Life Questionnaire (8-17yrs)

**Medication Questions**

For kidney disease medication to work, people have to take it according to their doctor’s instructions. For one reason or another, people can’t or don’t always take all of their pills as prescribed. We want to know how often you have missed kidney disease medication. Please answer the following.

|                                                                        |                                 |                                |
|------------------------------------------------------------------------|---------------------------------|--------------------------------|
| E1. Are you supposed to be taking medications for your kidney disease? | Yes<br><input type="checkbox"/> | No<br><input type="checkbox"/> |
|------------------------------------------------------------------------|---------------------------------|--------------------------------|

| If yes, in the past 7 days...                                              | Strongly Disagree             |                               |                               |                               | Strongly Agree                | Not Applicable                 |
|----------------------------------------------------------------------------|-------------------------------|-------------------------------|-------------------------------|-------------------------------|-------------------------------|--------------------------------|
| E2. I took all doses of my kidney disease medication.                      | <input type="checkbox"/><br>1 | <input type="checkbox"/><br>2 | <input type="checkbox"/><br>3 | <input type="checkbox"/><br>4 | <input type="checkbox"/><br>5 | <input type="checkbox"/><br>95 |
| E3. I missed or skipped at least one dose of my kidney disease medication. | <input type="checkbox"/><br>1 | <input type="checkbox"/><br>2 | <input type="checkbox"/><br>3 | <input type="checkbox"/><br>4 | <input type="checkbox"/><br>5 | <input type="checkbox"/><br>95 |
| E4. I was not able to take all of my kidney disease medication.            | <input type="checkbox"/><br>1 | <input type="checkbox"/><br>2 | <input type="checkbox"/><br>3 | <input type="checkbox"/><br>4 | <input type="checkbox"/><br>5 | <input type="checkbox"/><br>95 |

Sometimes it is difficult for people to take their medications. We would like to know if any of the following reasons are why you missed a dose of your kidney disease medication in the past 7 days.

| In the past 7 days...                          | Not at All                    |                               |                               |                               | Very Much                     | Not Applicable                 |
|------------------------------------------------|-------------------------------|-------------------------------|-------------------------------|-------------------------------|-------------------------------|--------------------------------|
| F1. I forgot.                                  | <input type="checkbox"/><br>1 | <input type="checkbox"/><br>2 | <input type="checkbox"/><br>3 | <input type="checkbox"/><br>4 | <input type="checkbox"/><br>5 | <input type="checkbox"/><br>95 |
| F2. I was busy.                                | <input type="checkbox"/><br>1 | <input type="checkbox"/><br>2 | <input type="checkbox"/><br>3 | <input type="checkbox"/><br>4 | <input type="checkbox"/><br>5 | <input type="checkbox"/><br>95 |
| F3. The medicine caused some side effects.     | <input type="checkbox"/><br>1 | <input type="checkbox"/><br>2 | <input type="checkbox"/><br>3 | <input type="checkbox"/><br>4 | <input type="checkbox"/><br>5 | <input type="checkbox"/><br>95 |
| F4. The medicine costs a lot of money.         | <input type="checkbox"/><br>1 | <input type="checkbox"/><br>2 | <input type="checkbox"/><br>3 | <input type="checkbox"/><br>4 | <input type="checkbox"/><br>5 | <input type="checkbox"/><br>95 |
| F5. I felt I did not need the medicine.        | <input type="checkbox"/><br>1 | <input type="checkbox"/><br>2 | <input type="checkbox"/><br>3 | <input type="checkbox"/><br>4 | <input type="checkbox"/><br>5 | <input type="checkbox"/><br>95 |
| F6. I ran out of medication.                   | <input type="checkbox"/><br>1 | <input type="checkbox"/><br>2 | <input type="checkbox"/><br>3 | <input type="checkbox"/><br>4 | <input type="checkbox"/><br>5 | <input type="checkbox"/><br>95 |
| F7. I was feeling too sick to take my medicine | <input type="checkbox"/><br>1 | <input type="checkbox"/><br>2 | <input type="checkbox"/><br>3 | <input type="checkbox"/><br>4 | <input type="checkbox"/><br>5 | <input type="checkbox"/><br>95 |

Thank You
