# Supplementary material
Source: PubMed Central journal article supplement (PMC6348011)
Supplement: NIHMS1512170-supplement-3.pdf [file NIHMS1512170-supplement-3.pdf]

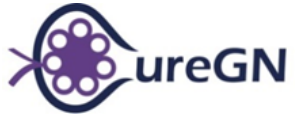

Item S3: CureGN Adult Quality of Life Questionnaire (Ages 18+)

Please indicate on the picture where you have had swelling in the past 7 days. Then, indicate how **severe** it was at each location **at its worst** in the **past 7 days**.

|                             | Absent <span style="float: right;">Worst Imaginable</span> |                               |                               |                               |                               |                               |
|-----------------------------|------------------------------------------------------------|-------------------------------|-------------------------------|-------------------------------|-------------------------------|-------------------------------|
| A. Swelling in your:        |                                                            |                               |                               |                               |                               |                               |
| 1. Whole body               | <input type="checkbox"/><br>0                              | <input type="checkbox"/><br>1 | <input type="checkbox"/><br>2 | <input type="checkbox"/><br>3 | <input type="checkbox"/><br>4 | <input type="checkbox"/><br>5 |
| 2. Face or around your eyes | <input type="checkbox"/><br>0                              | <input type="checkbox"/><br>1 | <input type="checkbox"/><br>2 | <input type="checkbox"/><br>3 | <input type="checkbox"/><br>4 | <input type="checkbox"/><br>5 |
| 3. Fingers or hands         | <input type="checkbox"/><br>0                              | <input type="checkbox"/><br>1 | <input type="checkbox"/><br>2 | <input type="checkbox"/><br>3 | <input type="checkbox"/><br>4 | <input type="checkbox"/><br>5 |
| 4. Arms                     | <input type="checkbox"/><br>0                              | <input type="checkbox"/><br>1 | <input type="checkbox"/><br>2 | <input type="checkbox"/><br>3 | <input type="checkbox"/><br>4 | <input type="checkbox"/><br>5 |
| 5. Stomach or abdomen       | <input type="checkbox"/><br>0                              | <input type="checkbox"/><br>1 | <input type="checkbox"/><br>2 | <input type="checkbox"/><br>3 | <input type="checkbox"/><br>4 | <input type="checkbox"/><br>5 |
| 6. Genitalia                | <input type="checkbox"/><br>0                              | <input type="checkbox"/><br>1 | <input type="checkbox"/><br>2 | <input type="checkbox"/><br>3 | <input type="checkbox"/><br>4 | <input type="checkbox"/><br>5 |
| 7. Legs                     | <input type="checkbox"/><br>0                              | <input type="checkbox"/><br>1 | <input type="checkbox"/><br>2 | <input type="checkbox"/><br>3 | <input type="checkbox"/><br>4 | <input type="checkbox"/><br>5 |
| 8. Feet                     | <input type="checkbox"/><br>0                              | <input type="checkbox"/><br>1 | <input type="checkbox"/><br>2 | <input type="checkbox"/><br>3 | <input type="checkbox"/><br>4 | <input type="checkbox"/><br>5 |

| <b>Please indicate how severe each kidney disease symptom was in the past 7 days</b> | <b>Absent</b>                 | <b>Mild</b>                   |                               |                               |                               | <b>Worst Imaginable</b>       |
|--------------------------------------------------------------------------------------|-------------------------------|-------------------------------|-------------------------------|-------------------------------|-------------------------------|-------------------------------|
| B1. Pain where you have swelling or pressure                                         | <input type="checkbox"/><br>0 | <input type="checkbox"/><br>1 | <input type="checkbox"/><br>2 | <input type="checkbox"/><br>3 | <input type="checkbox"/><br>4 | <input type="checkbox"/><br>5 |
| B2. Shortness of breath                                                              | <input type="checkbox"/><br>0 | <input type="checkbox"/><br>1 | <input type="checkbox"/><br>2 | <input type="checkbox"/><br>3 | <input type="checkbox"/><br>4 | <input type="checkbox"/><br>5 |
| B3. Trouble falling asleep                                                           | <input type="checkbox"/><br>0 | <input type="checkbox"/><br>1 | <input type="checkbox"/><br>2 | <input type="checkbox"/><br>3 | <input type="checkbox"/><br>4 | <input type="checkbox"/><br>5 |
| B4. Waking up at night                                                               | <input type="checkbox"/><br>0 | <input type="checkbox"/><br>1 | <input type="checkbox"/><br>2 | <input type="checkbox"/><br>3 | <input type="checkbox"/><br>4 | <input type="checkbox"/><br>5 |

| <b>Please respond to each item by Marking ONE box per row.</b>                                                                                                                                                                         | <b>Excellent</b>                                                               | <b>Very Good</b>              | <b>Good</b>                   | <b>Fair</b>                   | <b>Poor</b>                   |                               |                               |                               |                               |                               |                                |
|----------------------------------------------------------------------------------------------------------------------------------------------------------------------------------------------------------------------------------------|--------------------------------------------------------------------------------|-------------------------------|-------------------------------|-------------------------------|-------------------------------|-------------------------------|-------------------------------|-------------------------------|-------------------------------|-------------------------------|--------------------------------|
| C1. In general, would you say your health is:                                                                                                                                                                                          | <input type="checkbox"/><br>5                                                  | <input type="checkbox"/><br>4 | <input type="checkbox"/><br>3 | <input type="checkbox"/><br>2 | <input type="checkbox"/><br>1 |                               |                               |                               |                               |                               |                                |
| C2. In general, would you say your quality of life is:                                                                                                                                                                                 | <input type="checkbox"/><br>5                                                  | <input type="checkbox"/><br>4 | <input type="checkbox"/><br>3 | <input type="checkbox"/><br>2 | <input type="checkbox"/><br>1 |                               |                               |                               |                               |                               |                                |
| C3. In general, how would you rate your physical health?                                                                                                                                                                               | <input type="checkbox"/><br>5                                                  | <input type="checkbox"/><br>4 | <input type="checkbox"/><br>3 | <input type="checkbox"/><br>2 | <input type="checkbox"/><br>1 |                               |                               |                               |                               |                               |                                |
| C4. In general, how would you rate your mental health, including your mood and your ability to think?                                                                                                                                  | <input type="checkbox"/><br>5                                                  | <input type="checkbox"/><br>4 | <input type="checkbox"/><br>3 | <input type="checkbox"/><br>2 | <input type="checkbox"/><br>1 |                               |                               |                               |                               |                               |                                |
| C5. In general, how would you rate your satisfaction with your social activities and relationships?                                                                                                                                    | <input type="checkbox"/><br>5                                                  | <input type="checkbox"/><br>4 | <input type="checkbox"/><br>3 | <input type="checkbox"/><br>2 | <input type="checkbox"/><br>1 |                               |                               |                               |                               |                               |                                |
| C6. In general, please rate how well you carry out your usual social activities and roles. (This includes activities at home, at work, and in your community, and responsibilities as a parent, child, spouse, employee, friend, etc.) | <input type="checkbox"/><br>5                                                  | <input type="checkbox"/><br>4 | <input type="checkbox"/><br>3 | <input type="checkbox"/><br>2 | <input type="checkbox"/><br>1 |                               |                               |                               |                               |                               |                                |
|                                                                                                                                                                                                                                        | <b>Completely</b>                                                              | <b>Mostly</b>                 | <b>Moderately</b>             | <b>A Little</b>               | <b>Not at All</b>             |                               |                               |                               |                               |                               |                                |
| C7. To what extent are you able to carry out your everyday physical activities such as walking, climbing stairs, carrying groceries, or moving a chair?                                                                                | <input type="checkbox"/><br>5                                                  | <input type="checkbox"/><br>4 | <input type="checkbox"/><br>3 | <input type="checkbox"/><br>2 | <input type="checkbox"/><br>1 |                               |                               |                               |                               |                               |                                |
| <b>In the past 7 days...</b>                                                                                                                                                                                                           | <b>Never</b>                                                                   | <b>Rarely</b>                 | <b>Sometimes</b>              | <b>Often</b>                  | <b>Always</b>                 |                               |                               |                               |                               |                               |                                |
| D1. How often have you been bothered by emotional problems such as feeling anxious, depressed, or irritable?                                                                                                                           | <input type="checkbox"/><br>1                                                  | <input type="checkbox"/><br>2 | <input type="checkbox"/><br>3 | <input type="checkbox"/><br>4 | <input type="checkbox"/><br>5 |                               |                               |                               |                               |                               |                                |
|                                                                                                                                                                                                                                        | <b>None</b>                                                                    | <b>Mild</b>                   | <b>Moderate</b>               | <b>Severe</b>                 | <b>Very Severe</b>            |                               |                               |                               |                               |                               |                                |
| D2. How would you rate your fatigue on average?                                                                                                                                                                                        | <input type="checkbox"/><br>1                                                  | <input type="checkbox"/><br>2 | <input type="checkbox"/><br>3 | <input type="checkbox"/><br>4 | <input type="checkbox"/><br>5 |                               |                               |                               |                               |                               |                                |
|                                                                                                                                                                                                                                        | <b>No Pain</b> <span style="float: right;"><b>Worst Imaginable Pain</b></span> |                               |                               |                               |                               |                               |                               |                               |                               |                               |                                |
| D3. How would you rate your pain on average?                                                                                                                                                                                           | <input type="checkbox"/><br>0                                                  | <input type="checkbox"/><br>1 | <input type="checkbox"/><br>2 | <input type="checkbox"/><br>3 | <input type="checkbox"/><br>4 | <input type="checkbox"/><br>5 | <input type="checkbox"/><br>6 | <input type="checkbox"/><br>7 | <input type="checkbox"/><br>8 | <input type="checkbox"/><br>9 | <input type="checkbox"/><br>10 |

| In the past 7 days...                                                      | Never                         | Rarely                        | Sometimes                     | Often                         | Always                        |
|----------------------------------------------------------------------------|-------------------------------|-------------------------------|-------------------------------|-------------------------------|-------------------------------|
| D4. I felt worried.                                                        | <input type="checkbox"/><br>1 | <input type="checkbox"/><br>2 | <input type="checkbox"/><br>3 | <input type="checkbox"/><br>4 | <input type="checkbox"/><br>5 |
| D5. I felt stressed.                                                       | <input type="checkbox"/><br>1 | <input type="checkbox"/><br>2 | <input type="checkbox"/><br>3 | <input type="checkbox"/><br>4 | <input type="checkbox"/><br>5 |
| D6. How often did you feel tired?                                          | <input type="checkbox"/><br>1 | <input type="checkbox"/><br>2 | <input type="checkbox"/><br>3 | <input type="checkbox"/><br>4 | <input type="checkbox"/><br>5 |
| D7. How often did you experience extreme exhaustion?                       | <input type="checkbox"/><br>1 | <input type="checkbox"/><br>2 | <input type="checkbox"/><br>3 | <input type="checkbox"/><br>4 | <input type="checkbox"/><br>5 |
| D8. How often did you run out of energy?                                   | <input type="checkbox"/><br>1 | <input type="checkbox"/><br>2 | <input type="checkbox"/><br>3 | <input type="checkbox"/><br>4 | <input type="checkbox"/><br>5 |
| D9. How often did your fatigue limit you at work (including work at home)? | <input type="checkbox"/><br>1 | <input type="checkbox"/><br>2 | <input type="checkbox"/><br>3 | <input type="checkbox"/><br>4 | <input type="checkbox"/><br>5 |
| D10. How often were you too tired to think clearly?                        | <input type="checkbox"/><br>1 | <input type="checkbox"/><br>2 | <input type="checkbox"/><br>3 | <input type="checkbox"/><br>4 | <input type="checkbox"/><br>5 |
| D11. How often were you too tired to take a bath or shower?                | <input type="checkbox"/><br>1 | <input type="checkbox"/><br>2 | <input type="checkbox"/><br>3 | <input type="checkbox"/><br>4 | <input type="checkbox"/><br>5 |
| D12. How often did you have enough energy to exercise strenuously?         | <input type="checkbox"/><br>5 | <input type="checkbox"/><br>4 | <input type="checkbox"/><br>3 | <input type="checkbox"/><br>2 | <input type="checkbox"/><br>1 |
|                                                                            | <b>Not at All</b>             | <b>A Little Bit</b>           | <b>Somewhat</b>               | <b>Quite a Bit</b>            | <b>Very Much</b>              |
| D13. I had problems during the day because of poor sleep.                  | <input type="checkbox"/><br>1 | <input type="checkbox"/><br>2 | <input type="checkbox"/><br>3 | <input type="checkbox"/><br>4 | <input type="checkbox"/><br>5 |

### Medication Questions

For kidney disease medication to work, people have to take it according to their doctor's instructions. For one reason or another, people can't or don't always take all of their pills as prescribed. We want to know how often you have missed kidney disease medication. Please rate your agreement with the following statements.

|                                                                        |                                 |                                |
|------------------------------------------------------------------------|---------------------------------|--------------------------------|
| E1. Are you supposed to be taking medications for your kidney disease? | Yes<br><input type="checkbox"/> | No<br><input type="checkbox"/> |
|------------------------------------------------------------------------|---------------------------------|--------------------------------|

| If yes, in the past 7 days...                                              | Strongly Disagree             |                               |                               |                               | Strongly Agree                | Not Applicable                 |
|----------------------------------------------------------------------------|-------------------------------|-------------------------------|-------------------------------|-------------------------------|-------------------------------|--------------------------------|
| E2. I took all doses of my kidney disease medication.                      | <input type="checkbox"/><br>1 | <input type="checkbox"/><br>2 | <input type="checkbox"/><br>3 | <input type="checkbox"/><br>4 | <input type="checkbox"/><br>5 | <input type="checkbox"/><br>95 |
| E3. I missed or skipped at least one dose of my kidney disease medication. | <input type="checkbox"/><br>1 | <input type="checkbox"/><br>2 | <input type="checkbox"/><br>3 | <input type="checkbox"/><br>4 | <input type="checkbox"/><br>5 | <input type="checkbox"/><br>95 |
| E4. I was not able to take all of my kidney disease medication.            | <input type="checkbox"/><br>1 | <input type="checkbox"/><br>2 | <input type="checkbox"/><br>3 | <input type="checkbox"/><br>4 | <input type="checkbox"/><br>5 | <input type="checkbox"/><br>95 |

Sometimes it is difficult for people to take their medications. We would like to know if any of the following reasons are why you missed a dose of your kidney disease medication in the past 7 days.

| In the past 7 days...                                   | Not at All                    |                               |                               |                               | Very Much                     | Not Applicable                 |
|---------------------------------------------------------|-------------------------------|-------------------------------|-------------------------------|-------------------------------|-------------------------------|--------------------------------|
| F1. I forgot.                                           | <input type="checkbox"/><br>1 | <input type="checkbox"/><br>2 | <input type="checkbox"/><br>3 | <input type="checkbox"/><br>4 | <input type="checkbox"/><br>5 | <input type="checkbox"/><br>95 |
| F2. I was busy.                                         | <input type="checkbox"/><br>1 | <input type="checkbox"/><br>2 | <input type="checkbox"/><br>3 | <input type="checkbox"/><br>4 | <input type="checkbox"/><br>5 | <input type="checkbox"/><br>95 |
| F3. They caused some side effects.                      | <input type="checkbox"/><br>1 | <input type="checkbox"/><br>2 | <input type="checkbox"/><br>3 | <input type="checkbox"/><br>4 | <input type="checkbox"/><br>5 | <input type="checkbox"/><br>95 |
| F4. They cost a lot of money.                           | <input type="checkbox"/><br>1 | <input type="checkbox"/><br>2 | <input type="checkbox"/><br>3 | <input type="checkbox"/><br>4 | <input type="checkbox"/><br>5 | <input type="checkbox"/><br>95 |
| F5. I was afraid they may affect my sexual performance. | <input type="checkbox"/><br>1 | <input type="checkbox"/><br>2 | <input type="checkbox"/><br>3 | <input type="checkbox"/><br>4 | <input type="checkbox"/><br>5 | <input type="checkbox"/><br>95 |
| F6. I felt I did not need them.                         | <input type="checkbox"/><br>1 | <input type="checkbox"/><br>2 | <input type="checkbox"/><br>3 | <input type="checkbox"/><br>4 | <input type="checkbox"/><br>5 | <input type="checkbox"/><br>95 |
| F7. I ran out of medication.                            | <input type="checkbox"/><br>1 | <input type="checkbox"/><br>2 | <input type="checkbox"/><br>3 | <input type="checkbox"/><br>4 | <input type="checkbox"/><br>5 | <input type="checkbox"/><br>95 |
| F8. I was feeling too ill to take them.                 | <input type="checkbox"/><br>1 | <input type="checkbox"/><br>2 | <input type="checkbox"/><br>3 | <input type="checkbox"/><br>4 | <input type="checkbox"/><br>5 | <input type="checkbox"/><br>95 |

Thank You
