# Supplementary material
Source: PubMed Central journal article supplement (PMC6348011)
Supplement: NIHMS1512170-supplement-5.pdf [file NIHMS1512170-supplement-5.pdf]

**Table S2. Biospecimen volumes by visit type.** Pediatric volumes are based on weight at the time of visit.

| Visit type                    | Total Blood Volume |                 |                  | Total Urine Volume |                 |                  |
|-------------------------------|--------------------|-----------------|------------------|--------------------|-----------------|------------------|
|                               | V0, Baseline (mL)  | V1, Yearly (mL) | V2-3, Event (mL) | V0, Baseline (mL)  | V1, Yearly (mL) | V2-3, Event (mL) |
| <b>Pediatric participants</b> |                    |                 |                  |                    |                 |                  |
| <21 pounds                    | 20                 | 20              | 20               | 75                 | 20              | 75               |
| 21-<52 pounds                 | 45                 | 20              | 45               | 75                 | 20              | 80               |
| >52 pounds                    | 50                 | 20              | 50               | 80                 | 20              | 80               |
| <b>Adult participants</b>     | 50                 | 20              | 50               | 80                 | 20              | 80               |

Abbreviations: EDTA, ethylenediaminetetraacetic acid; NaN<sub>3</sub>, sodium azide; SST, serum separator.
