# Supplementary material
Source: PubMed Central journal article supplement (PMC6348011)
Supplement: NIHMS1512170-supplement-6.pdf [file NIHMS1512170-supplement-6.pdf]

**Table S3. Biospecimen and pathology collection.**

| <b>Blood</b>                                            | <b>Urine</b>                                           | <b>Pathology</b>                             |
|---------------------------------------------------------|--------------------------------------------------------|----------------------------------------------|
| Whole blood for genomic DNA (EDTA tube)                 | Spot urine cleared supernatant (sodium azide)          | Local report                                 |
| EBV immortalized cell lines (ACD tube, pediatrics only) | Spot urine cleared supernatant (protease inhibitor)    | Digital whole slide images of glass slides   |
| Plasma (sodium citrate tube)                            | Spot urine cell pellet (RNA later, sodium azide)       | Electron microscopy digital images           |
| Plasma (sodium heparin)                                 | Spot urine cell pellet (RNA later, protease inhibitor) | Immunofluorescence microscopy digital images |
| Whole blood for genomic RNA (PaxGene tube)              | Timed urine (whole)*                                   |                                              |
| Plasma (EDTA tube)                                      |                                                        |                                              |
| Serum (serum separator tube)                            |                                                        |                                              |

\*If timed urine is not available, first morning void may be used.

Abbreviations: ACD, acid citrate dextrose; DNA, deoxyribonucleic acid; EBV, Epstein-Barr virus; EDTA, ethylenediaminetetraacetic acid; RNA, ribonucleic acid.
